# Supplementary material for: Impaired osteoblast and osteoclast function characterize the osteoporosis of Snyder - Robinson syndrome
Source: Springer Nature journal article supplement (doi:10.1186/s13023-015-0235-8), 2015-03-06
Supplement: MOESM1 [file 9776050]

**Supplementary Table 1.** CNVs detected in the propositi.

| UDP_929                   |             |                  |                              | UDP_930                   |             |                  |                              | Interpretation                        |
|---------------------------|-------------|------------------|------------------------------|---------------------------|-------------|------------------|------------------------------|---------------------------------------|
| CNV region (hg19)         | Copy number | Parent of origin | No. of RefSeq genes affected | CNV region (hg19)         | Copy number | Parent of origin | No. of RefSeq genes affected |                                       |
| chr02:242873800-243034519 | 1           | Both             | 3                            | chr02:242873800-243034519 | 1           | Both             | 3                            | Common deletion-unlikely pathogenic   |
| chr03:65191847-65214533   | 1           | Maternal         | 0                            | chr03:65191847-65214533   | 1           | Maternal         | 0                            | Common deletion-unlikely pathogenic   |
| chr03:162131408-162142475 | 1           | Paternal         | 0                            |                           |             |                  |                              | Common deletion-unlikely pathogenic   |
| chr04:64138341-64150666   | 1           | Paternal         | 0                            |                           |             |                  |                              | Common deletion-unlikely pathogenic   |
| chr04:161059762-161071059 | 1           | Paternal         | 0                            | chr04:161059762-161071059 | 1           | Paternal         | 0                            | Common deletion-unlikely pathogenic   |
|                           |             |                  |                              | chr05:97048466-97099320   | 1           | Maternal         | 0                            | Common deletion-unlikely pathogenic   |
|                           |             |                  |                              | chr05:140225908-140233387 | 1           | Maternal         | 9                            | Common deletion-unlikely pathogenic   |
| chr06:29855945-29881038   | 1           | Maternal         | 3                            |                           |             |                  |                              | Common deletion-unlikely pathogenic   |
| chr06:32282216-32288238   | 1           | Paternal         | 1                            |                           |             |                  |                              | Father unaffected-unlikely pathogenic |
| chr07:40440233-40476625   | 1           | Maternal         | 1                            | chr07:40440233-40476625   | 1           | Maternal         | 1                            | Mother unaffected-unlikely pathogenic |
| chr07:157746669-157803711 | 3           | Paternal         | 1                            |                           |             |                  |                              | Father unaffected-unlikely pathogenic |
| chr10:59172666-59379460   | 3           | Maternal         | 0                            | chr10:59172666-59379460   | 3           | Maternal         | 0                            | Mother unaffected-unlikely pathogenic |
| chr11:84350040-84574040   | 1           | Paternal         | 1                            | chr11:84350040-84574040   | 1           | Paternal         | 1                            | Father unaffected-unlikely pathogenic |
|                           |             |                  |                              | chr11:8959020-8964938     | 1           | Maternal         | 0                            | Mother unaffected-unlikely pathogenic |
|                           |             |                  |                              | chr12:27648411-27654546   | 1           | Paternal         | 1                            | Father unaffected-unlikely pathogenic |
| chr13:69247022-           | 1           | Maternal         | 0                            | chr13:69247022-           | 1           | Maternal         | 0                            | Common deletion-                      |

|                         |   |          |   |                         |   |          |   |                                           |
|-------------------------|---|----------|---|-------------------------|---|----------|---|-------------------------------------------|
| 69267981                |   |          |   | 69267981                |   |          |   | unlikely pathogenic                       |
|                         |   |          |   | chr16:87709933-87714284 | 1 | Paternal | 1 | Father unaffected-<br>unlikely pathogenic |
|                         |   |          |   | chr18:13798739-13804919 | 1 | Maternal | 0 | Mother unaffected-<br>unlikely pathogenic |
| chr18:66747568-66755508 | 1 | Maternal | 0 |                         |   |          |   | Common deletion-<br>unlikely pathogenic   |
| chr18:67209141-67217271 | 1 | Maternal | 0 |                         |   |          |   | Common deletion-<br>unlikely pathogenic   |

**Supplemental Table 2.** Exome variants meeting rarity and predicted deleteriousness requirements and segregating with disease.

| Chr | Position (hg19) | Ref Allele | Var Allele   | Gene     | Transcript     | Protein change | dbSNP       | Phenotype Score | Variant Score | Exomiser Score | Genotype | Sanger             | Seg |
|-----|-----------------|------------|--------------|----------|----------------|----------------|-------------|-----------------|---------------|----------------|----------|--------------------|-----|
| 17  | 4795537         | C          | G            | MINK1    | NM_153827.4    | intron 17      |             | 0.33            | 0             | 3.75E-05       | Het      | C/G                | Y   |
| 17  | 4796267         | C          | T            | MINK1    | NM_153827.4    | intron 19      | rs142172345 | 0.33            | 0             | 3.75E-05       | Het      | C/T                | Y   |
| X   | 21995292        | A          | G            | SMS      | NM_004595.3    | p.Gln148Arg    | rs397515551 | 0.73            | 1             | 9.30E-01       | Hemi     | G                  | Y   |
| X   | 12704225        | A          | G            | FRMPD4   | NM_014728.3    | p.Lys195Glu    | rs146493613 | 0.12            | 0.99          | 9.41E-03       | Hemi     | G                  | Y   |
| 01  | 989899          | C          | T            | AGRN     | NM_198576.2    | p.Thr198Met    | rs147569326 | 0.30            | 0.86          | 2.63E-02       | Het      | C/T                | N   |
| 01  | 10753989        | G          | A            | CASZ1    | NM_001079843.1 | intron 3       | rs185185302 | 0               | 0             | 8.62E-07       | Het      | *                  | *   |
| 01  | 204125492       | -          | CAGACAG<br>A | REN      | NM_000537.3    | intron 7       |             | 0.73            | 0             | 4.10E-03       | Het      | -<br>/CAGA<br>CAGA | N   |
| 01  | 180910200       | A          | G            | KIAA1614 | NM_020950.1    | p.Thr980Ala    | rs201945338 | 0.55            | 0             | 5.26E-04       | Het      | A/G                | N   |
| 02  | 97851096        | A          | C            | ANKRD36  | NM_001164315.1 | intron 29      |             | 0               | 0             | 8.62E-07       | Het      | A/A                | N   |
| 03  | 47037984        | G          | A            | NBEAL2   | NM_015175.2    | p.Arg792Gln    | rs140354422 | 0.63            | 0.84          | 5.06E-01       | Het      | *                  | *   |
| 03  | 49723739        | A          | C            | MST1     | NM_020998.3    | intron 8       |             | 0.28            | 0.60          | 2.75E-03       | Het      | A/A                | N   |
| 04  | 5746919         | C          | T            | EVC      | NM_153717.2    | intron 6       | rs61514191  | 0.74            | 0             | 4.71E-03       | Het      | TTC/-              | N   |
| 07  | 141537945       | T          | A            | PRSS37   | NM_001008270.2 | intron 2       | rs11766230  | 0.20            | 0             | 8.58E-06       | Het      | A/T                | N   |
| 08  | 10470571        | G          | A            | RP1L1    | NM_178857.5    | p.Ala346Gly    |             | 0.75            | 1             | 9.39E-01       | Het      | G/A                | N   |
| 10  | 17164788        | A          | -            | CUBN     | NM_001081.3    | intron 6       |             | 0.28            | 0             | 2.33E-05       | Het      | A/-                | N   |
| 11  | 92573911        | G          | A            | FAT3     | NM_001008781.2 | p.Val351Met    | rs10765565  | 0.44            | 0.79          | 7.20E-02       | Het      | T/A                | N   |
| 12  | 6472752         | G          | A            | SCNN1A   | NM_001159576.1 | p.Arg240Gly    | rs55797039  | 0.73            | 0.29          | 3.85E-02       | Het      | GC/AA              | N   |
| 15  | 77087795        | T          | C            | SCAPER   | NM_020843.2    | intron 8       | rs189913101 | 0               | 0             | 8.62E-07       | Het      | T/C                | N   |
| 16  | 14014242        | T          | A            | ERCC4    | NM_005236.2    | intron 1       |             | 0.77            | 0             | 6.31E-03       | Het      | T/A                | N   |

|    |          |          |   |        |                |             |                 |      |      |          |     |            |   |
|----|----------|----------|---|--------|----------------|-------------|-----------------|------|------|----------|-----|------------|---|
| 16 | 84213684 | C        | T | TAF1C  | NM_005679.3    | p.Gly523Arg | rs4150167       | 0.62 | 0.15 | 3.57E-03 | Het | C/T        | N |
| 17 | 14139702 | G        | A | CDRT15 | NM_001007530.1 | p.Ala103Gly | rs13892446<br>6 | 0.52 | 0    | 3.60E-04 | Het | G/A        | N |
| 18 | 22642716 | C        | A | ZNF521 | NM_015461.2    | intron 7    | rs19950711<br>4 | 0.27 | 0    | 2.07E-05 | Het | *          | * |
| 19 | 1581272  | C        | T | MBD3   | NM_001281453.1 | intron 4    | rs14219878<br>6 | 0.59 | 0    | 7.66E-04 | Het | C/T        | N |
| 19 | 19646467 | G        | A | YJEFN3 | NM_198537.3    | p.Val225Met | rs20022728<br>2 | 0    | 0.81 | 5.85E-04 | Het | G/A        | N |
| 19 | 42853636 | TCA<br>C | - | MEGF8  | NM_001271938.1 | intron 13   |                 | 0.33 | 0    | 3.78E-05 | Het | TCAC/<br>- | N |

Abbreviations: Chr, chromosome; Ref, reference; Sanger, Sanger sequencing result; Seg, segregation with disease in family; Var, variant

\*Variants not confirmed by Sanger sequencing because the variants lay in repetitive sequence that could not be sequenced by standard PCR amplification of genomic DNA and dideoxy terminator sequencing methods.

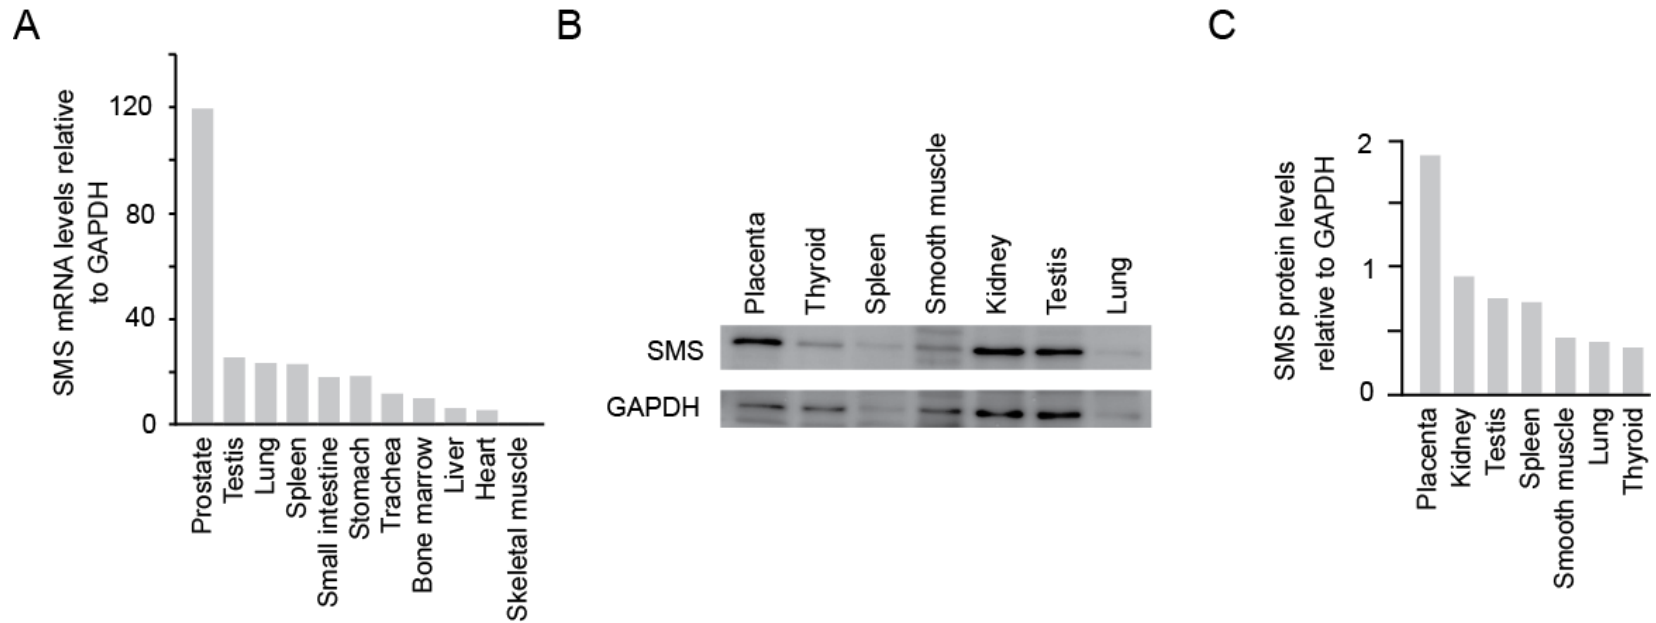

**Supplementary Figure 1:** Expression profile of SMS mRNA and protein. (A) Graph showing qRT-PCR detection of SMS mRNA levels in total RNA extracted from the respective tissues. SMS mRNA levels were normalized to the mRNA levels of GAPDH. (B) Immunoblot showing SMS protein levels in lysates from the respective tissues. (C) SMS protein expression in each tissue plotted relative to GAPDH protein expression.
